# Supplementary material
Source: PubMed Central journal article supplement (PMC6705137)
Supplement: NIHMS1521672-supplement-1.pdf [file NIHMS1521672-supplement-1.pdf]

## Supplemental Table 1

### Supplemental Figure Statistics

| Figure                          | Panel | Statistical test                    | Effects                              | Statistic             | p-value             |
|---------------------------------|-------|-------------------------------------|--------------------------------------|-----------------------|---------------------|
| S1                              | A     | One-way ANOVA                       |                                      | $F_{(2,19)} = 20.71$  | < 0.0001            |
|                                 |       |                                     |                                      | $F_{(2,19)} = 8.27$   | 0.003               |
|                                 | C     | Two-way ANOVA                       | No effect of Group                   | $F_{(1,27)} = 0.20$   | 0.661               |
|                                 |       |                                     | No effect of Test                    | $F_{(1,27)} = 0.58$   | 0.452               |
|                                 |       |                                     | Significant Group X Test interaction | $F_{(1,27)} = 19.39$  | < 0.001             |
|                                 | D     | Two-way ANOVA                       | No effect of Group                   | $F_{(1,27)} = 0.38$   | 0.541               |
|                                 |       |                                     | No effect of Test                    | $F_{(1,27)} = 4.10$   | 0.053               |
|                                 |       |                                     | Significant Group X Test interaction | $F_{(1,27)} = 12.78$  | 0.001               |
|                                 | S2    | A                                   | Two-way RM ANOVA                     | No effect of Genotype | $F_{(1,16)} = 1.89$ |
| Significant effect of Light     |       |                                     |                                      | $F_{(1,16)} = 10.77$  | 0.005               |
| No Genotype X Light interaction |       |                                     |                                      | $F_{(1,16)} = 0.03$   | 0.859               |
| B                               |       | Two-way RM ANOVA                    | No effect of Genotype                | $F_{(1,16)} = 1.21$   | 0.289               |
|                                 |       |                                     | Significant effect of Light          | $F_{(1,16)} = 6.26$   | 0.024               |
|                                 |       |                                     | No Genotype X Light interaction      | $F_{(1,16)} = 4.18$   | 0.058               |
| C                               |       | Two-way RM ANOVA                    | No effect of Genotype                | $F_{(1,16)} = 0.06$   | 0.805               |
|                                 |       |                                     | No effect of Light                   | $F_{(1,16)} = 0.31$   | 0.586               |
|                                 |       |                                     | No Genotype X Light interaction      | $F_{(1,16)} = 0.01$   | 0.928               |
| D                               |       | Two-way RM ANOVA                    | No effect of Genotype                | $F_{(1,13)} = 0.27$   | 0.610               |
|                                 |       |                                     | Significant effect of Light          | $F_{(1,13)} = 6.60$   | 0.023               |
|                                 |       |                                     | No Genotype X Light interaction      | $F_{(1,13)} < 0.01$   | 0.982               |
| E                               |       | Two-way RM ANOVA                    | Significant effect of Genotype       | $F_{(1,13)} = 4.92$   | 0.045               |
|                                 |       |                                     | No effect of Light                   | $F_{(1,13)} = 0.38$   | 0.546               |
|                                 |       |                                     | No Genotype X Light interaction      | $F_{(1,13)} = 0.35$   | 0.562               |
| F                               |       | Two-way RM ANOVA                    | No effect of Genotype                | $F_{(1,13)} = 1.72$   | 0.212               |
|                                 |       |                                     | No effect of Light                   | $F_{(1,13)} = 0.36$   | 0.560               |
|                                 |       |                                     | No Genotype X Light interaction      | $F_{(1,13)} < 0.01$   | 0.993               |
| S3                              | C     | Two-way RM ANOVA                    | Significant effect of Genotype       | $F_{(1,16)} = 11.06$  | 0.004               |
|                                 |       |                                     | No effect of Light                   | $F_{(1,16)} = 0.01$   | 0.931               |
|                                 |       |                                     | No Genotype X Light interaction      | $F_{(1,16)} = 0.61$   | 0.447               |
| S4                              | B     | Student's <i>t</i> -test, two-sided |                                      | $t_{(6)} = 5.78$      | 0.001               |
|                                 | D     | Mann Whitney test                   |                                      | $U_{(6)} = 0$         | 0.036               |
| S5                              | B     | Two-way RM ANOVA                    | No effect of Group                   | $F_{(2,17)} = 3.20$   | 0.066               |
|                                 |       |                                     | No effect of Light                   | $F_{(1,17)} = 1.98$   | 0.177               |
|                                 |       |                                     | No Group X Light interaction         | $F_{(2,17)} = 0.74$   | 0.492               |
|                                 | C     | Two-way RM ANOVA                    | No effect of Group                   | $F_{(2,17)} = 0.93$   | 0.413               |

|    |   |                  |                                       |                     |       |
|----|---|------------------|---------------------------------------|---------------------|-------|
|    |   |                  | No effect of Light                    | $F_{(1,17)} = 0.50$ | 0.489 |
|    |   |                  | No Group X Light interaction          | $F_{(2,17)} = 1.91$ | 0.179 |
|    | D | Two-way RM ANOVA | No effect of Group                    | $F_{(2,17)} = 1.08$ | 0.362 |
|    |   |                  | No effect of Light                    | $F_{(1,17)} = 1.30$ | 0.270 |
|    |   |                  | No Group X Light interaction          | $F_{(2,17)} = 3.57$ | 0.051 |
|    |   |                  | No effect of Light                    | $F_{(1,17)} = 1.30$ | 0.270 |
|    |   |                  | No Group X Light interaction          | $F_{(2,17)} = 3.57$ | 0.051 |
| S6 | C | Two-way RM ANOVA | No effect of Group                    | $F_{(2,17)} = 2.26$ | 0.135 |
|    |   |                  | No effect of Light                    | $F_{(1,17)} = 0.25$ | 0.624 |
|    |   |                  | Significant Group X Light interaction | $F_{(2,17)} = 4.44$ | 0.028 |

## Supplemental Table 2

### Male/Female Group Distribution

| Figure | Group                       | Male | Female | Total |
|--------|-----------------------------|------|--------|-------|
| 1      | No Ext                      | 6    | 2      | 8     |
|        | Ext                         | 6    | 2      | 8     |
|        | Alt Ctx                     | 3    | 3      | 6     |
| 2      | Acq-Tag/ExtTest             | 4    | 4      | 8     |
|        | Ext-Tag/ExtTest             | 4    | 4      | 8     |
|        | Acq-Tag/SpontRec            | 4    | 4      | 8     |
|        | Ext-Tag/SpontRec            | 3    | 4      | 7     |
| 3      | ArcCreER <sup>12</sup> (-): | 6    | 3      | 9     |
|        | ArcCreER <sup>12</sup> (+): | 5    | 4      | 9     |
| 4      | ArcCreER <sup>12</sup> (-): | 3    | 5      | 8     |
|        | ArcCreER <sup>12</sup> (+): | 4    | 3      | 7     |
| 5      | Acq-Tag(-)                  | 3    | 3      | 6     |
|        | Acq-Tag(+)                  | 2    | 2      | 4     |
|        | Ext-Tag(-)                  | 3    | 3      | 6     |
|        | Ext-Tag(+)                  | 1    | 3      | 4     |
